# Supplementary material for: Identification of Compounds That Promote Readthrough of Premature Termination Codons in the CFTR
Source: PubMed Central journal article supplement — SLAS Discov. 2020 Oct 5;26(2):205–15. doi: 10.1177/2472555220962001 (PMC7838340; doi:10.1177/2472555220962001), 2020-10-05
Supplement: Supplement.pdf [file Supplement.pdf]

## **Identification of Compounds that Promote Readthrough of Premature Termination Codons in the CFTR**

**Emery Smith<sup>1†</sup>, Danijela Dukovski<sup>2†</sup>, Justin Shumate<sup>1</sup>, Louis Scampavia<sup>1</sup>, John P. Miller<sup>2</sup> and Timothy P. Spicer<sup>1\*</sup>**

<sup>1</sup>The Scripps Research Institute Molecular Screening Center, Department of Molecular Medicine, Scripps Florida, 130 Scripps Way, Jupiter, Florida, USA

<sup>2</sup>Proteostasis Therapeutics, Inc., 80 Guest Street, Boston, Massachusetts, USA

† Equal contribution

\* Communicating author

Address correspondence to:

*Timothy Spicer, Ph.D.*

*Department of Molecular Medicine*

*The Scripps Research Institute, Scripps Florida*

*130 Scripps Way*

*Jupiter, FL 33458*

*Email: [spicert@scripps.edu](mailto:spicert@scripps.edu)*

*561-228-2150*

**Supplement Table 1: CFTR Readthrough Initial 1536 Issues to Address**

| <b>Step</b> | <b>Issue for 1536 well implementation</b>                                                                                                                              |
|-------------|------------------------------------------------------------------------------------------------------------------------------------------------------------------------|
| 1           | <i>Transient transfected cells need to be made, since no stable cell line is available</i>                                                                             |
| 2           | <i>Cell number needs optimized for 1536 well format</i>                                                                                                                |
| 3           | <i>Aspiration is slow and variable in 1536 well format (not addressed, just eliminated)</i>                                                                            |
| 4           | Must use either FLIPR pintool or 1536 well pipettor. Addition concentrations will need to be optimized. (Pintool did not work – data not shown, proceeded to pipettor) |
| 5           | Amplifier and stimulation concentration optimization                                                                                                                   |
| 6           | Incubation time needs to be optimized                                                                                                                                  |
| 7           | Read times will be optimized after seeing kinetic traces of the responses                                                                                              |

**Supplement Table 2: CFTR Readthrough 1536 well Protocol**

| <b>Step</b> | <b>Parameter</b>                 | <b>Value</b> | <b>Description</b>                        |
|-------------|----------------------------------|--------------|-------------------------------------------|
| 1           | <i>Cell Plating</i>              | 3µl/well     | 3,600c/w, spin                            |
| 2           | Dispense PTI-CH, VX-809 and G418 | 1µl/well     | Corrector, amplifier and positive control |
| 3           | Compound addition                | 30nl/well    | Pintool addition                          |
| 4           | Compound incubation              | 48 hours     | 37°C, 99% R.H., 5% CO <sub>2</sub>        |
| 5           | FMP Blue dye addition            | 3µl/well     | Dispenser addition in assay buffer        |
| 6           | Dye incubation                   | 30 minutes   | 37°C, 99% R.H., 5% CO <sub>2</sub>        |
| 7           | FLIPR Pre-Pin with basal read 1  | 5 seconds    | Average baseline read on FLIPR            |
| 8           | Forskolin and Genistein addition | 2µl/well     | 1536 FLIPR Pipettor dispense              |
| 9           | Forskolin incubation             | 30 minutes   | RT in the dark                            |
| 10          | FLIPR Read 2                     | 5 seconds    | Average 30 minute read on FLIPR           |
| 11          | Data analysis                    | 510/545nm    | Read 2/read 1                             |
